# Supplementary material for: A network-based analysis of systemic inflammation in humans
Source: Springer Nature journal article supplement (doi:10.1038/nature03985), 2005-08-31
Supplement: 41586_2005_BFnature03985_MOESM3_ESM.pdf [file 41586_2005_BFnature03985_MOESM3_ESM.pdf]

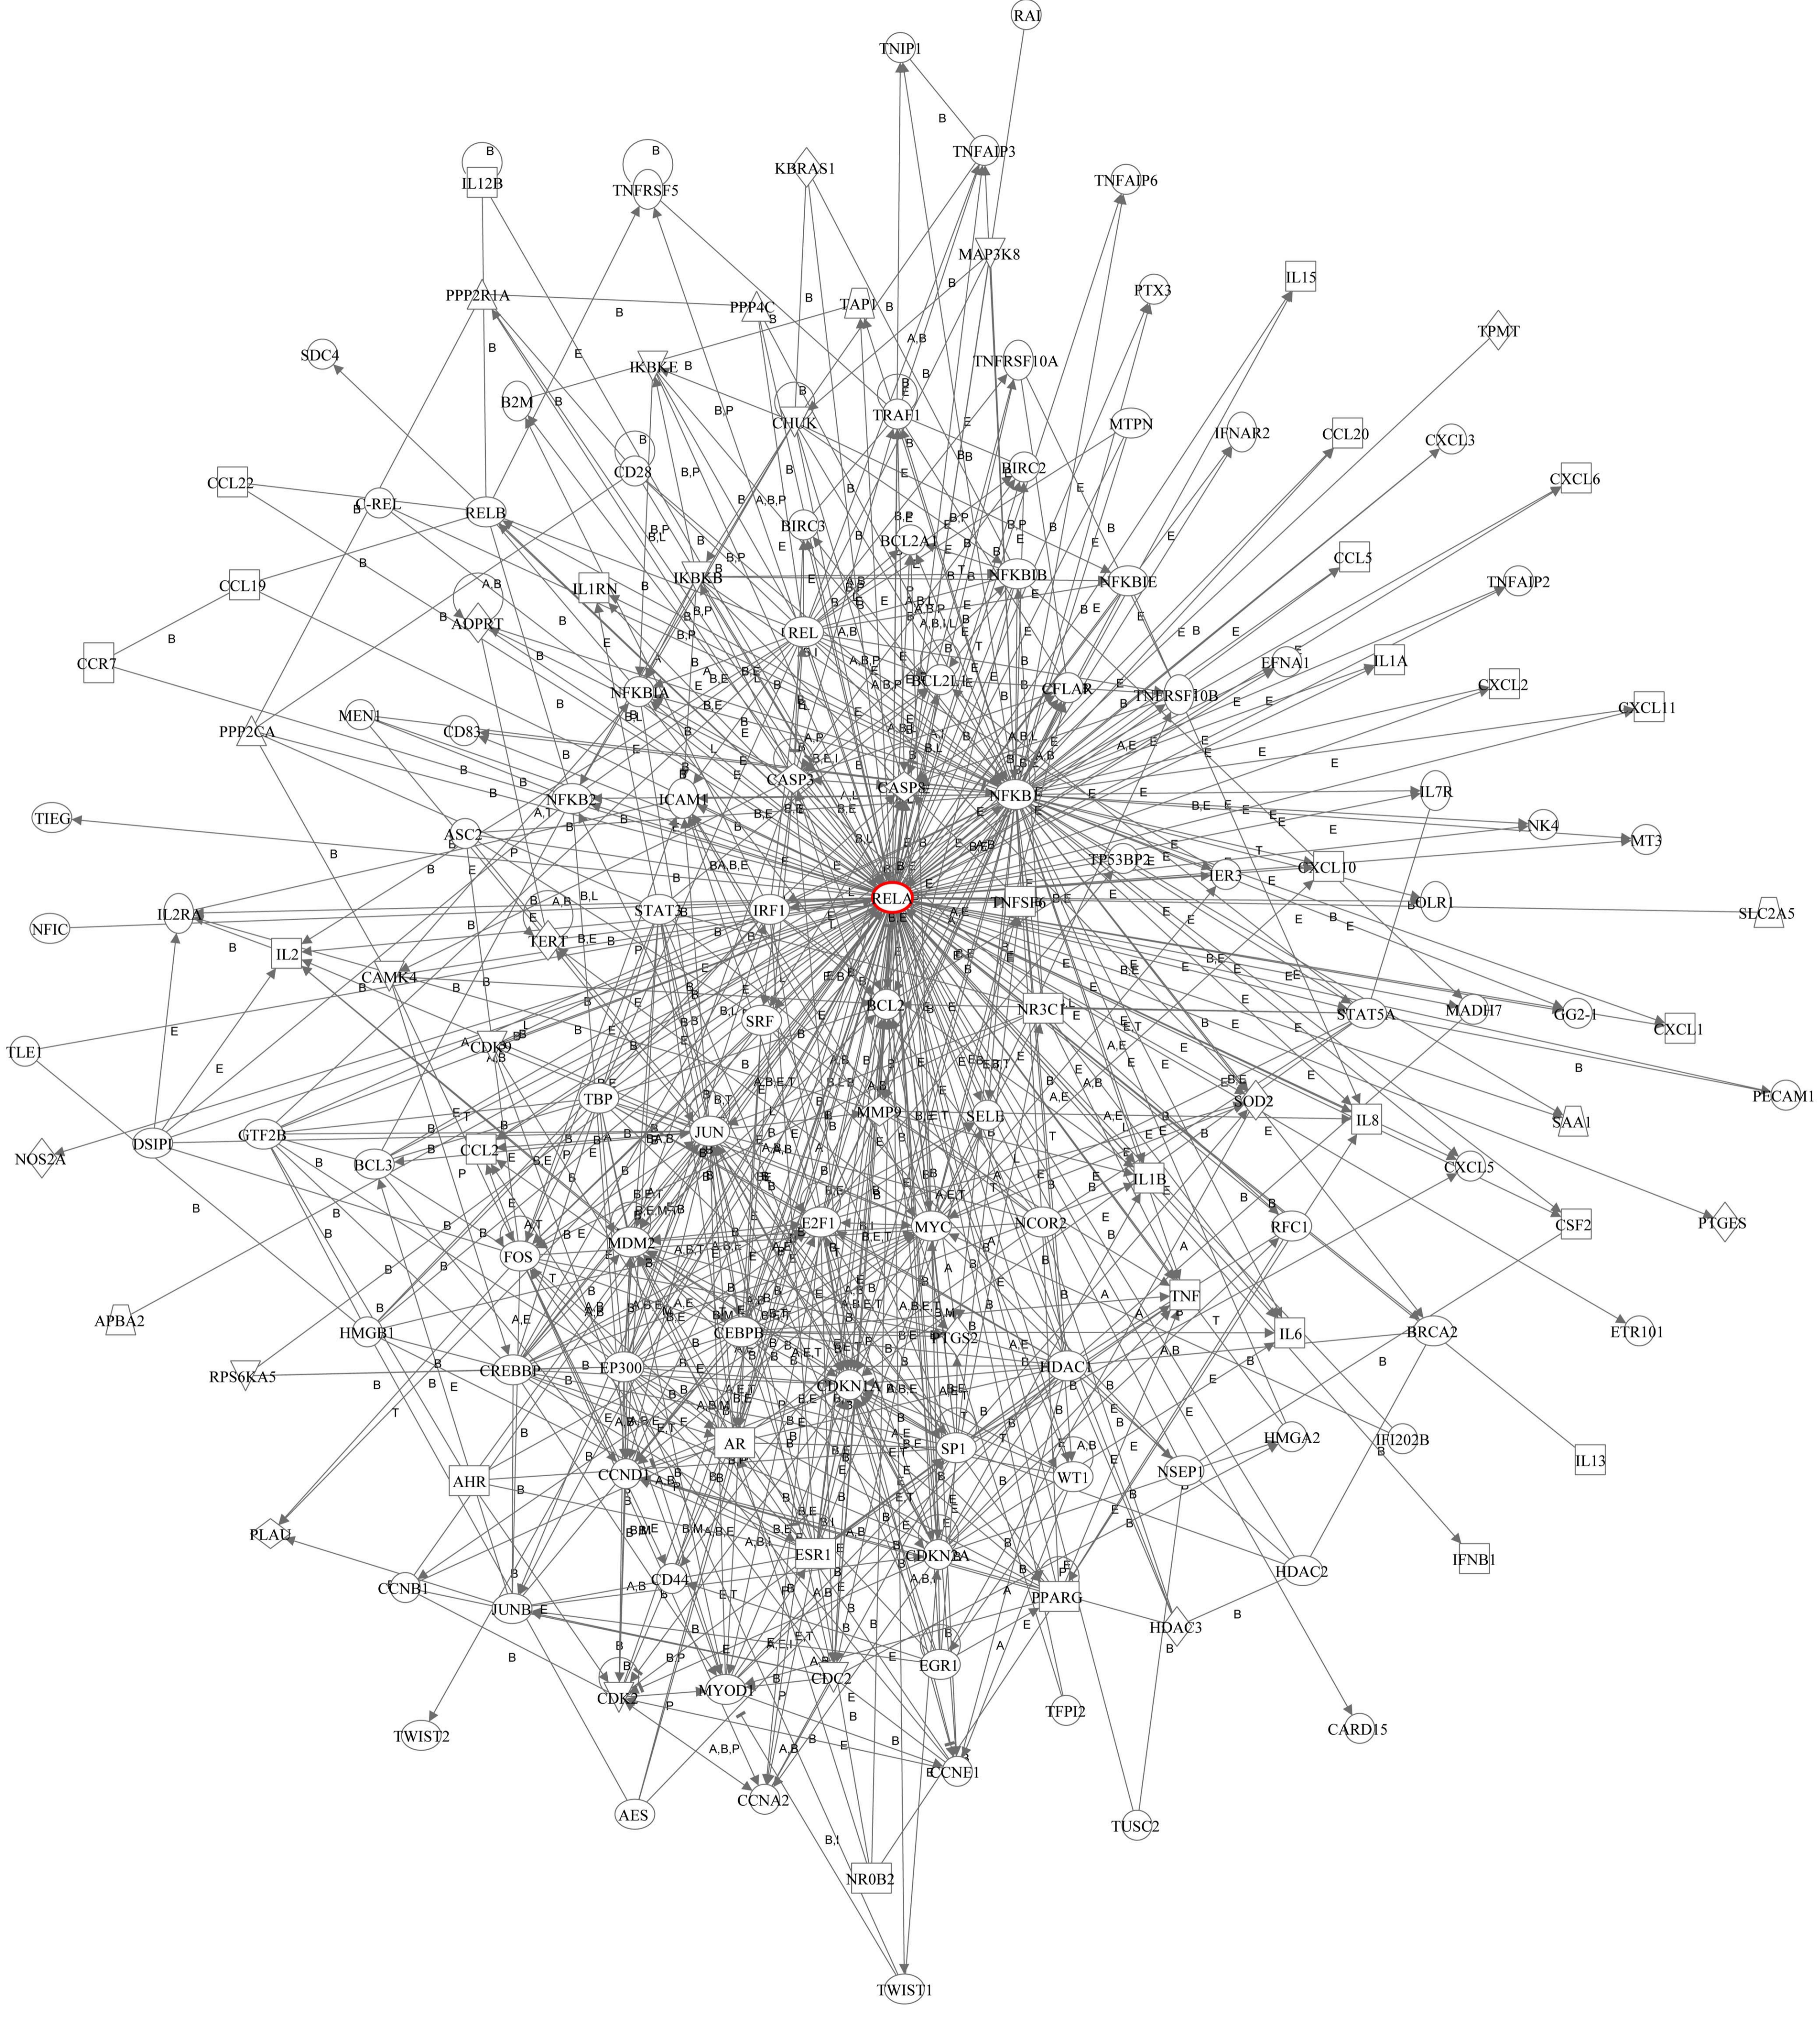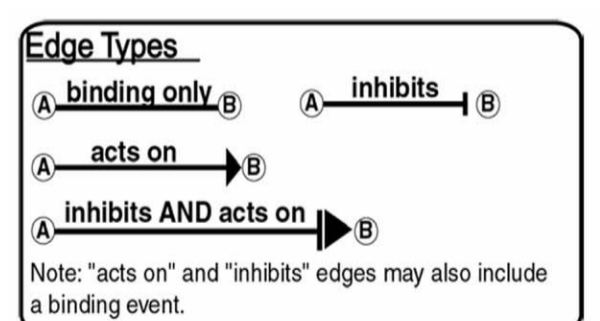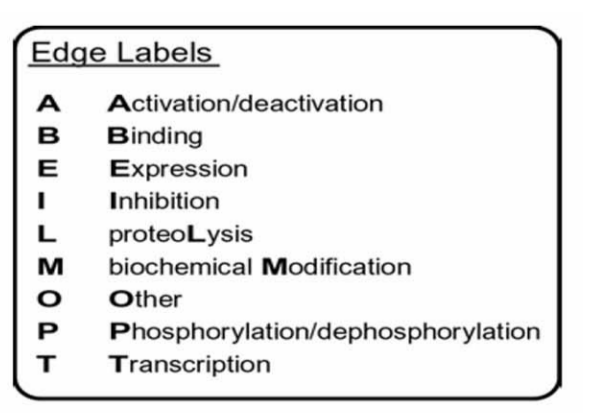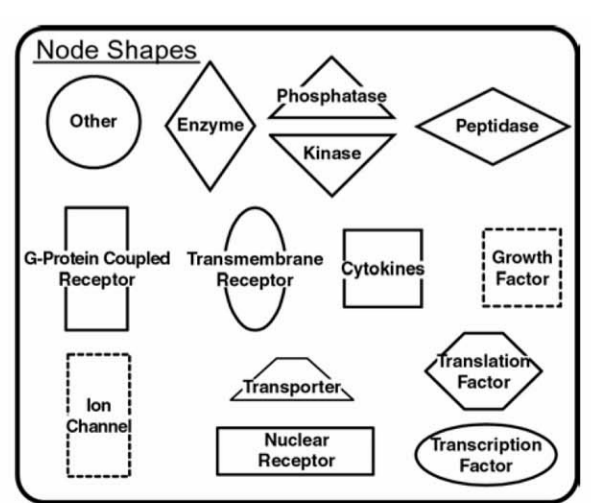



## **Supplementary Figure 1**

Gene-gene interactions surrounding RELA captured in the observed human interactome. The immediate neighborhood of the nuclear factor kappa beta gene, RELA, includes 150 genes and 619 direct interactions, derived from 847 published articles. Interactions among genes were modeled as activation, binding, expression, inhibition, proteolysis, modification, phosphorylation, or transcription. The genes were further identified as being either an enzyme, peptidase, growth factor, transcription/translation factor, receptor, cytokine, or kinase/phosphatase by the shape of the node.
